# Supplementary material
Source: publisher figshare collection journal article supplement (https://sage.figshare.com/ndownloader/files/34022703)
Supplement: Supplementary file 1 [file 34022703]

**Appendix 3: Coding scheme of the three research questions**

| **Research question/Analytical category** | **Descriptive category** | **Sub-category**  **[number of studies endorsing each sub-category]** | **Example of initial code** |
| --- | --- | --- | --- |
| RQ1 - Conceptualisation of learner autonomy | Self-regulation | Works frequently cited – Barry Zimmerman [27] | “In the light of Zimmerman’s (1994) conceptual model of academic self-regulation, the current study aims to…” (Abadikhah et al., 2019, p. 2). |
| Works frequently cited – Paul Pintrich [21] | “SRL is defined as an active and constructive process whereby learners develop goals for their learning and attempt to monitor, regulate, and control their cognition, motivation, and behavior for attaining their goals (Pintrich & Zusho, 2002)” (Bai et al., 2018, p. 524). |
| Works frequently cited – Dale Schunk [18] | “SRL is the foundation upon which learners to build their academic skills (Zimmerman & Schunk, 2011)” (Fukuda, 2019, p. 66). |
| Works frequently cited – Philip Candy [8] | “In his four-dimensional model, Candy (1991) underlines personal autonomy, self-management, learner-control and autodidaxy which refers to self-instruction taking place outside the formal educational setting in SRL” (Kizil & Savran, 2016, p. 148). |
| Works frequently cited – D. Randy Garrison [5] | “… and Garrison (1997) were more interactive in design and incorporated both the context and the nature of the learning process”. (Grover et al., 2015, p. 13). |
| Learner autonomy | Works frequently cited – Phil Benson [26] | “Adopting the constructivist perspective, I identify behaviors and attitudes related to autonomy that involve the concept of control over the learning process (Benson, 2010)” (Bedoya, 2015, p. 84). |
| Works frequently cited – Henri Holec [24] | “The present study is based on this definition, first introduced by Holec in a report that was published by the Council of Europe and focused on adult education (1979; cited in Holec, 1981)” (Bekleyen & Selimoglu, 2016, p. 2). |
| Works frequently cited – David Little [14] | “According to the influential definition by Little (1991, p. 4), autonomy is essentially a ‘capacity for detachment, critical reflection, decision-making, and independent action.’” (Cakici, 2018, p. 89). |
| Works frequently cited – Leslie Dickinson [13] | “Nevertheless, it should be noted that ‘autonomy is achieved slowly, through struggling towards it, through careful training and careful preparation on the teacher’s part as well as on the learner’s’ (Dickinson, 1995)” (Cheng et al., 2019, p. 11). |
| Works frequently cited – William Littlewood [10] | “… but Littlewood (1996) argued that autonomy included ability and willingness” (Lu & Berg, 2019, p. 568). |
| Works frequently cited – David Nunan [14] | “… while Nunan (1988) believes that the ‘systematic use of self-assessment’ (p. 130) can help ‘sensitise’ learners to their role and assist in their development as autonomous learners” (Everhard, 2019, p. 180). |
| Works frequently cited – Leni Dam [8] | “No matter what teachers did, an efficient and effective way of teaching and learning wasn’t fulfilled because of lack of learner’s involvement and responsibility for their own learning (Dam, 2009)” (Unal et al., 2018, p. 117). |
| Works frequently cited – Andrew Littlejohn [2] | “Learner autonomy claims that involving students in decision making processes related to their own language competence, ‘they are likely to be more enthusiastic about learning’ (Littlejohn, 1985, p. 258)” (Tabrizi & Saeidi, 2015, p. 158). |
| Learner psychology | Motivation [8] | “The goal was to integrate the idea of ready-made frameworks with nonlinear dynamic motivation (Dörnyei & Ryan, 2015) within a process-oriented paradigm (Basharina, 2007) instead of a product-oriented paradigm to foster learner autonomy” (Bahari, 2018, p. 69-70). |
| Self-efficacy [4] | “Self-efficacy and SRL strategies are closely related to each other and are predictive of students’ academic achievement…” (Wang et al., 2013, p. 2). |
| Metacognition [3] | “Strategies specific to reading can be classified in the following three clusters of metacognition: planning, monitoring, and evaluating strategies” (Eissa, 2016, p. 52). |
| Learner beliefs [2] | “The first introduces the notion of autonomy and explores three relevant areas of the literature: learner beliefs about language learning;…” (Benson & Lor, 1998, p. 1). |
| Anxiety [1] | “Horwitz, Horwtiz, and Cope (1986) defined foreign language anxiety as ‘a distinct complex of self-perceptions, beliefs, feelings, and behaviors related to classroom language learning arising from the uniqueness of the language learning process’ (p. 128)” (Martirossian & Hartoonian, 2015, p. 209). |
| Awareness [1] | “According to Reinders (2010), it is an integral part to help raise students’ awareness of undertaking learning outside the classroom and preparing them on their path toward autonomy” (Xuan et al., 2019, p. 57). |
| Autonomy-promoting language teaching and learning practices | Technology-enabled autonomous learning [3] | “digital games” (Sylvén & Sundqvist, 2012, p. 302) |
| Autonomy-promoting assessment (self- or peer assessment) [2] | “The importance of assessment as a means of prooting autonomy has been examined by…” (Everhard, 2019, p. 180). |
| Community of practice [1] | “Drawing on the Communities of Practice (CoP) framework by Lave & Wenger (1991),…” (Yamaguchi, 2012, p. 268). |
| Cooperative learning [1] | “Learning within cooperative groups deeply affects the whole personality of learners: cognitively, emotionally and socially” (Ahmed & Dakhiel, 2019, p. 140). |
| Learner-centred teaching [1] | “The present study aimed to identify the effectiveness of learner-centred teaching in modifying attitude towards EFL and developing academic self-motivation” (Ahmed & Dakhiel, 2019, p. 139). |
| Reflective teaching [1] | “The study has sought to explore the effect of reflective teaching on learner autonomy…” (Abdolrezapour & Fallah, 2015, p. 305). |
| Scenario-based learning [1] | “… scenario-based learning design developed in this study is proposed to provide intentional use of authentic situations to exemplify context-specific themes” (Seker, 2017, p. 2). |
| Language learning strategies | General learning strategies [2] | “learning strategies” (Huang, 2011, p. 251) |
| Reading strategies [2] | “The results of data analysis showed that the students took more advantage of reading strategies instruction…” (Karimi et al., 2018, p. 1). |
| Writing strategies [1] | “The study investigated the effects of time on L2 writing quality and learners’ use of writing strategies…” (Na & Yoon, 2016, p. 195). |
| Vocabulary strategies [1] | “Therefore, the goal of this study was to examine the effects of self-regulated vocabulary learning process on self-efficacy” (Mizumoto ,2014, p. 254). |
| Theoretical frameworks | Socio-constructivism [2] | “social-constructivist view on language learning” (Wach, 2013, p. 370) |
| Socialisation [2] | “In fact, attitude is one aspect of social motives acquired during socialization” (Ahmed & Dakhiel, 2019, p. 140). |
| Sociocultural theory [1] | “sociocultural theory” (Sylvén & Sundqvist, 2012, p. 305) |
| Connectivism [1] | “the principles of connectivism” (Bedoya, 2015, p. 84) |
| Second language acquisition hypotheses [1] | “Krahsen’s (1982) Input Hypothesis”; Long’s (1981) Interaction Hypothesis” (Sylvén & Sundqvist, 2012, p. 305) |

| **Research question/Analytical category** | **Descriptive category** | **Sub-category**  **[number of studies endorsing each sub-category]** | **Example of initial code** |
| --- | --- | --- | --- |
| RQ2 - Operationalisation of learner autonomy | Intervention | Description of the intervention [23] | “The training programme was conducted in the first three weeks over 8 sessions. In these sessions, the participants received training on social strategies (SS) for clarification and correction, cooperating with others, and empathising the culture of English speakers” (Kaur & Singh, 2018, p. 34). |
| Duration of intervention [18] | “The number of actual instructional sessions ranged from 13-17 between groups…” (Barkel, 2018, p. 31). |
| Materials used [16] | “In the year which this study was carried out, students were first introduced to the ILP by their class teacher and through a handout explaining the principles, stages and requirements of the programme” (Benson & Lor, 1998, p. 18). |
| Actors of intervention | Information about participants [21] | “In total, 210 first- and second-year university students from 6 intact English classes at a private university in northern Taiwan were recruited for this research” (Liu et al., 2014, p. 406). |
| Role of learners [19] | “Experimental Group (EG) received contemplative practices as well as self-direction education along with the components” (Giveh, 2018, p. 62). |
| Role of teacher [18] | “The teacher informed the children that they were going to fill in the diary task at the start and finish of each lesson about the entire lesson they had had” (Ferreira et al., 2017, p. 596). |
| Information about teacher [8] | “… four experienced advisers, all women, who had from 11 to 23 years of practice” (Ciekanski, 2007, p. 117). |
| No operationalisation | No intervention [37] | *(N/A Studies are coded under this category when no intervention is reported.)* |
| RQ 3- Evaluation of learner autonomy | Perceptual evaluation | Questionnaires [56] | “The instruments used in this study were a 4-point Likert-scale Self-Regulated learning Strategies Questionnaire…” (Abbasian & Hartoonian, 2014, p. 161). |
| Interviews [11] | “An in-depth semi-structured interview was used to allow the students to express their feelings and opinions freely” (Arias, 2015, p. 39). |
| Performance-based evaluation | Language proficiency tests [19] | “Thus, the participants’ English language proficiency can be determined by their CET-4 scores” (Cheng et al., 2018, p. 6). |
| Observational evaluation | Tasks [11] | “Data sources included the participants’ reflective writings,…” (Lu & Liu, 2016, p. 40). |
| Field notes [1] | “The database for this report consists of the researchers’ observation…” (Benson & Lor, 1998, p. 19). |
| Documents [1] | “Data sources included… teaching plans, guidelines of the current secondary English curriculum, learning materials…” (Lu & Liu, 2016, p. 40). |
